# Supplementary material for: Influence of chalcogen composition on the structural transition and on the electronic and optical properties of the monolayer titanium trichalcogenide ordered alloys
Source: Royal Society of Chemistry journal article supplement (doi:10.1039/c7cp06750j), 2017-12-08
Supplement: c7cp06750j1.pdf [file c7cp06750j1.pdf]

## Supporting Information

### Influence of chalcogen composition on the structural transition and on the electronic and optical properties of the monolayer titanium trichalcogenide ordered alloys

F. Ersan,<sup>1</sup> H. Duygu Ozaydin,<sup>1</sup> and E. Aktürk<sup>1,2,\*</sup>

<sup>1</sup>*Department of Physics, Adnan Menderes University, Aydin 09010, Turkey*

<sup>2</sup>*Nanotechnology Application and Research Center,  
Adnan Menderes University, Aydin 09010, Turkey*

(Dated: December 14, 2017)

PACS numbers: 62.23.Kn, 71.15.Mb, 73.22.-f, 71.20.-b

#### I. OPTICAL PROPERTIES

From the dynamical dielectric response functions  $\varepsilon(\omega)$ , absorption coefficient  $\alpha(\omega)$  can be obtained. We calculated it by using the following equation;

$$\alpha(\omega) = (\sqrt{2})\omega[\sqrt{\varepsilon_1(\omega)^2 + \varepsilon_2(\omega)^2} - \varepsilon_1(\omega)]^{1/2} \quad (1)$$

---

\* Electronic address: [ethem.akturk@adu.edu.tr](mailto:ethem.akturk@adu.edu.tr)

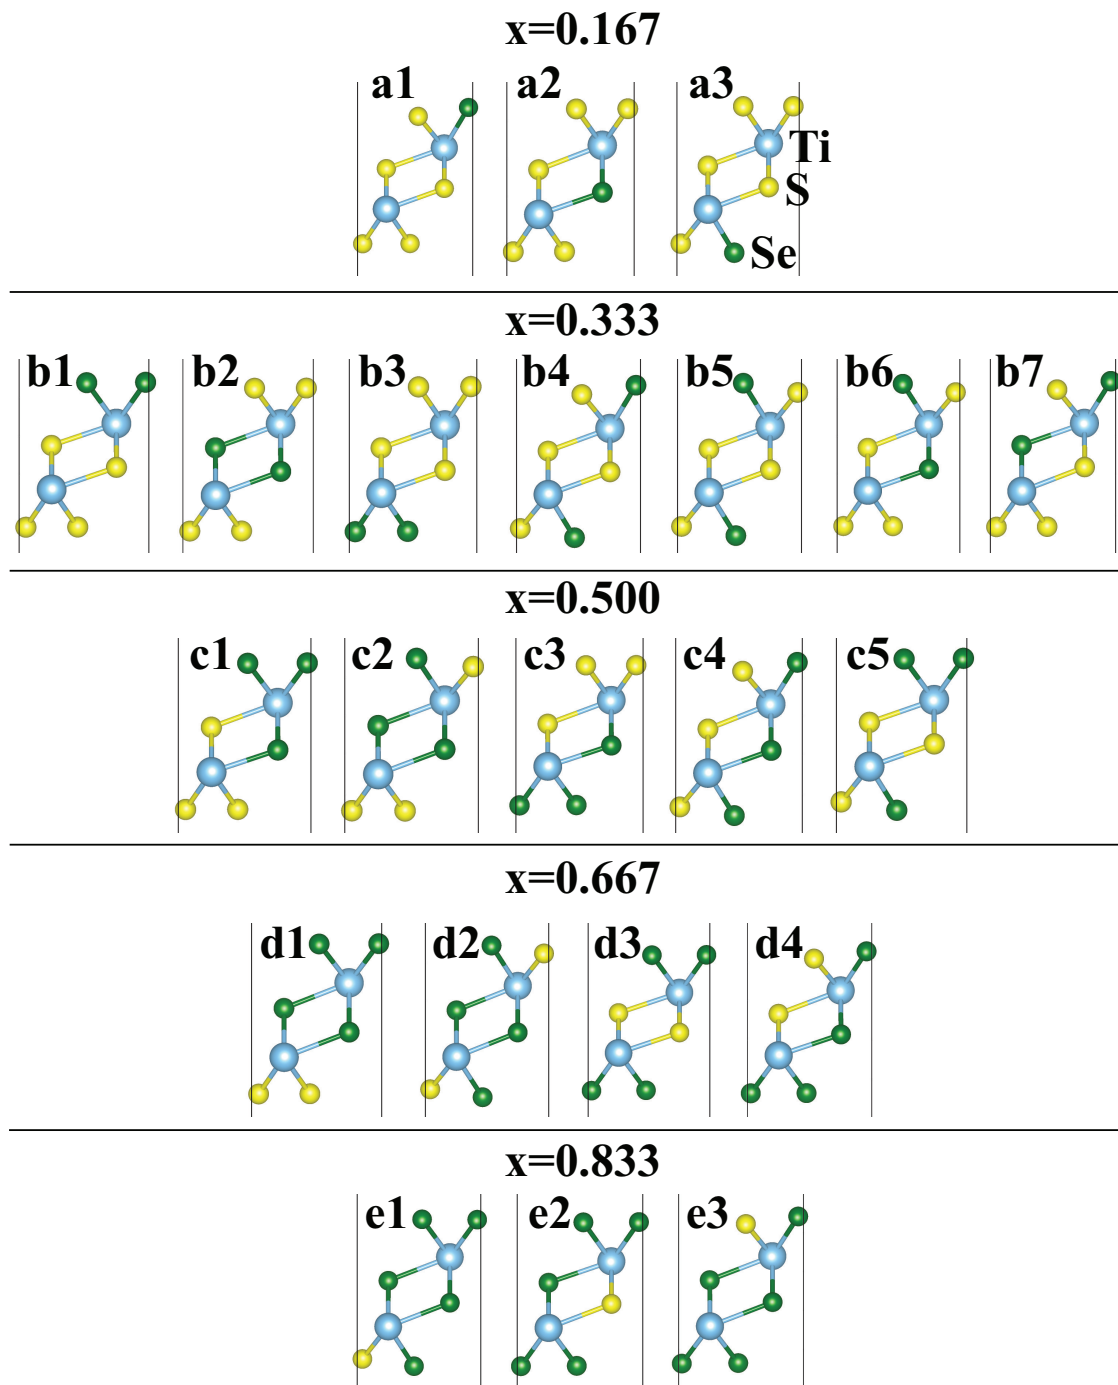

FIG. 1: (Color online) Considered of all possible  $\text{TiX}_{3(1-x)}\text{X}'_{3x}$  monolayers as a function of the chalcogen atoms concentration  $x$ .  $\text{TiS}_{3(1-x)}\text{Se}_{3x}$  alloys are illustrated for instance.

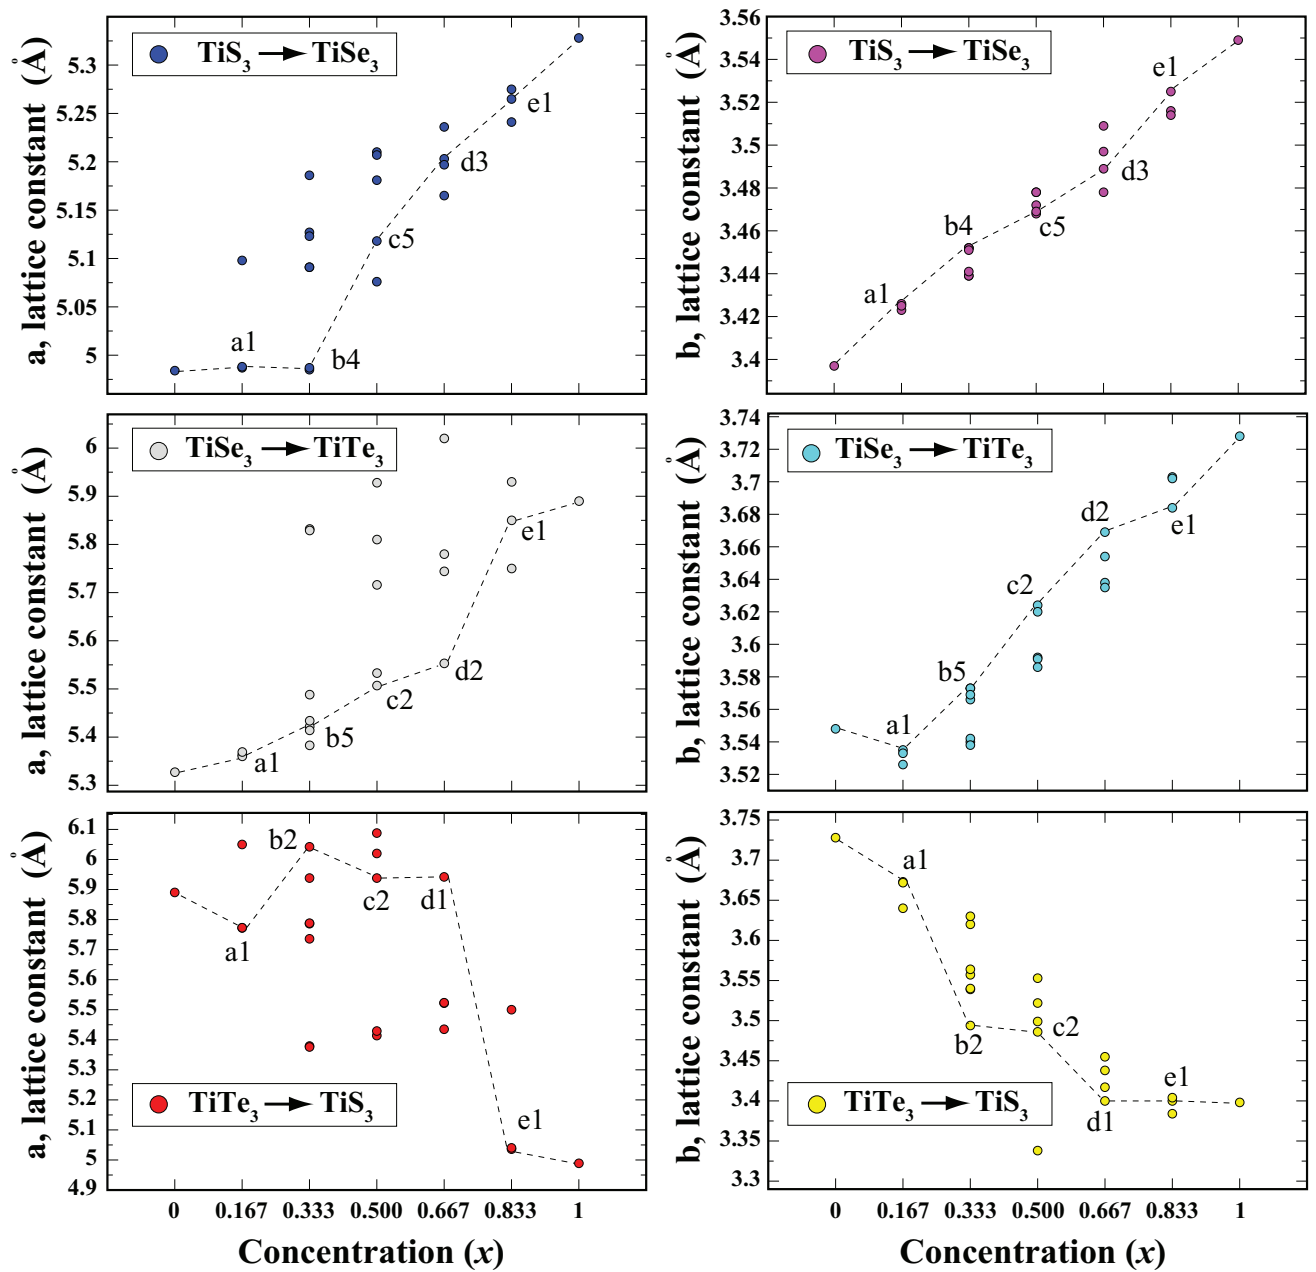

FIG. 2: (Color online) Lattice constants of  $\text{TiX}_{3(1-x)}\text{X}'_{3x}$  monolayers along a- and b- directions as a function of the chalcogen atoms concentration  $x$  for all considered possible structures.

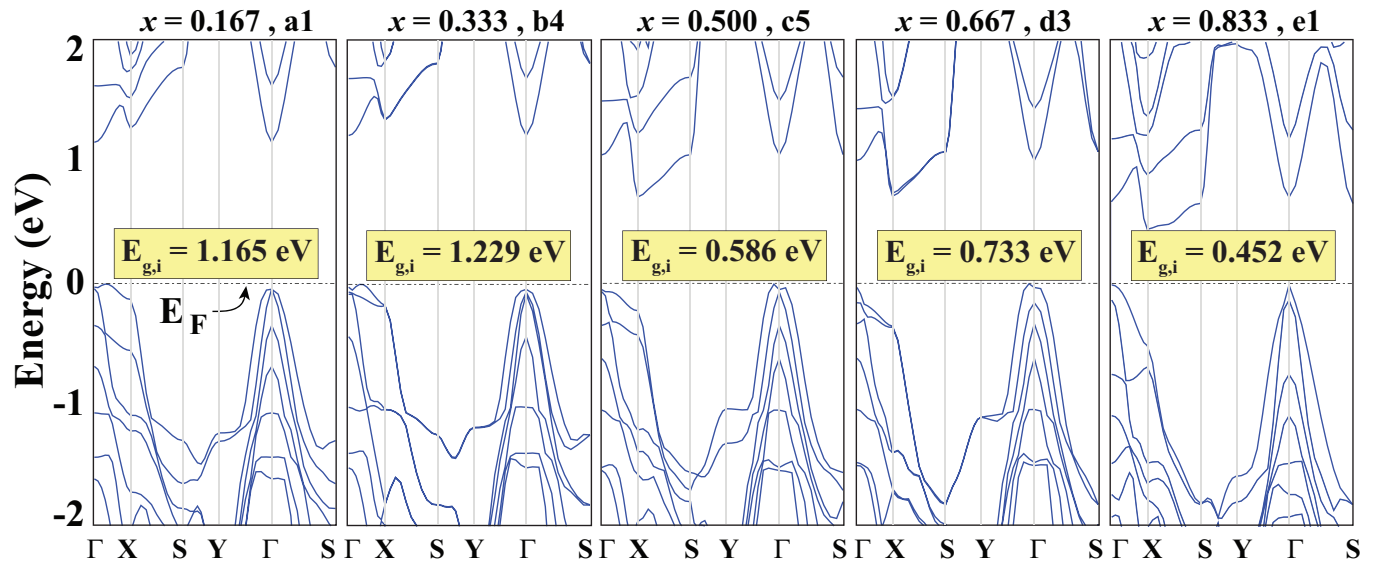

FIG. 3: (Color online) Electronic band structure of  $\text{TiS}_{3(1-x)}\text{Se}_{3x}$  monolayers for the energetically most favorable structural allotropes with HSE methods.

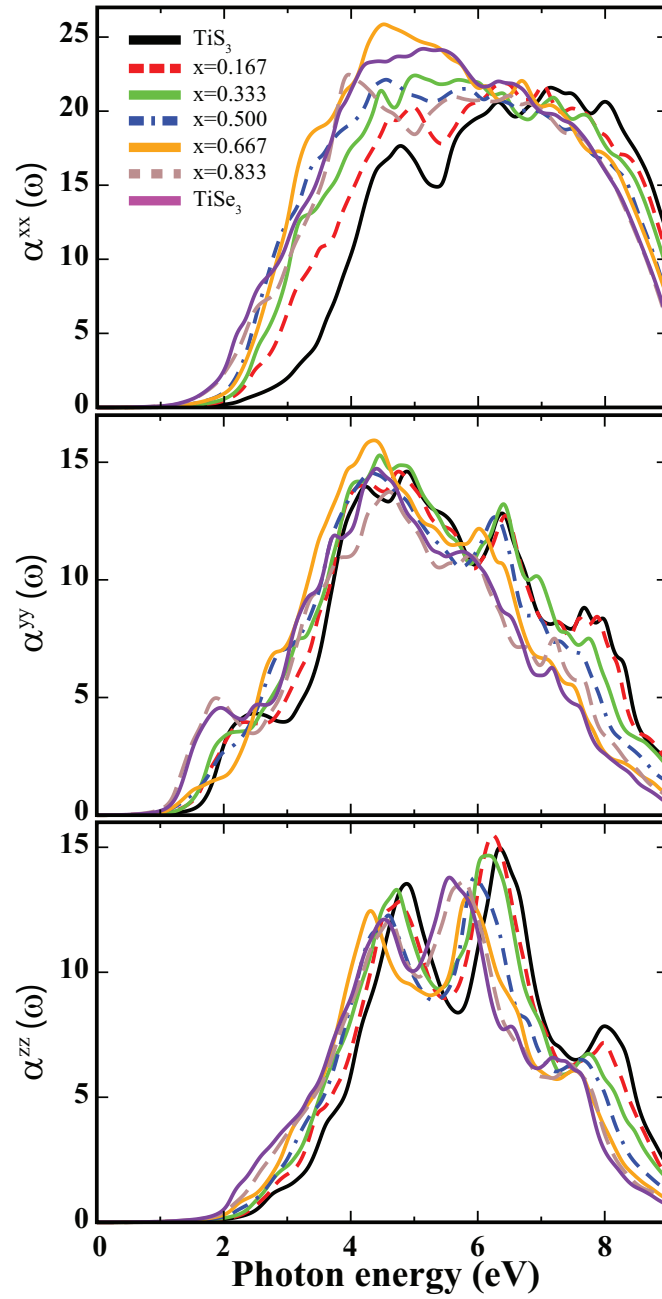

FIG. 4: (Color online) Absorption spectrum of energetically favorable  $\text{TiS}_{3(1-x)}\text{Se}_{3x}$  monolayers as a function of photon energy for different concentration.
